# Supplementary material for: Prediction of Progression in Polycystic Kidney Disease Using the Kidney Failure Risk Equation and Ultrasound Parameters
Source: PubMed Central journal article supplement — Can J Kidney Health Dis. 2020 Mar 18;7:2054358120911274. doi: 10.1177/2054358120911274 (PMC7081470; doi:10.1177/2054358120911274), 2020-03-18
Supplement: CJKHD_suppl.pdf [file CJKHD_suppl.pdf]

**Supplemental Table 1.** C-statistic for eGFR + best model versus KFRE + best model predicting eGFR decline >30% or renal replacement therapy at 1, 3 and 5-years.

| <b>Time to 30%<br/>eGFR decline or<br/>RRT:</b> | <b>eGFR +<br/>best model</b> | <b>KFRE +<br/>best model</b> |
|-------------------------------------------------|------------------------------|------------------------------|
| <b>1 year</b>                                   | 0.73<br>(0.63-0.82)          | 0.84<br>(0.76-0.92)          |
| <b>3 year</b>                                   | 0.72<br>(0.65-0.79)          | 0.76<br>(0.70-0.82)          |
| <b>5 year</b>                                   | 0.78<br>(0.71-0.84)          | 0.81<br>(0.76-0.86)          |

\*best model includes age, sex, hypertension, systolic bp, TKV

Abbreviations: eGFR estimate glomerular filtration rate, KFRE kidney failure risk equation,

**Supplemental Table 2.** Delta C-statistic and integrated discrimination index comparing the eGFR + best model to KFRE + best model in predicting the 1, 3 and 5-year risk of a 30% decline in eGFR or RRT

| <b>Time to 30%<br/>eGFR decline<br/>or RRT:</b> | <b>eGFR + best model</b>     |                              |
|-------------------------------------------------|------------------------------|------------------------------|
|                                                 | <b><u>ΔAUC</u></b>           | <b><u>IDI</u></b>            |
| <b>1 year</b>                                   | 0.1188<br>(0.0654-0.1722)    | 0.3070<br>(0.226-0.3914)     |
| <b>3 year</b>                                   | 0.0482<br>(0.0145-0.0819)    | 0.0943<br>(0.0612-0.1274)    |
| <b>5 year</b>                                   | 0.0406<br>(0.0128 to 0.0685) | 0.0608<br>(0.0393 to 0.0823) |

Abbreviations: eGFR estimate glomerular filtration rate, RRT renal replacement therapy, AUC area under the curve, IDI integrated discrimination index
